# Supplementary material for: Activated prostaglandin D2 receptors on macrophages enhance neutrophil recruitment into the lung
Source: PubMed Central journal article supplement — J Allergy Clin Immunol. Author manuscript; Available in PMC 2016 Jul 20. (PMC4954606; doi:10.1016/j.jaci.2015.11.012), 2016-01-12

*Activated prostaglandin D2 receptors on macrophages enhance neutrophil recruitment into the lung*

*Katharina Jandl, MSc, Elvira Stacher, MD, Zoltán Bálint, PhD, Eva Maria Sturm, PhD, Jovana Maric, MSc, Miriam Peinhaupt, MSc, Petra Luschig, PhD, Ida Aringer, MD, Alexander Fauland, PhD, Viktoria Konya, PhD, Sven-Erik Dahlen, PhD, Craig E. Wheelock, PhD, Dagmar Kratky, PhD, Andrea Olschewski, MD, Gunther Marsche, PhD, Rufina Schuligoj, PhD, Akos Heinemann, MD*

*Journal of Allergy and Clinical Immunology*  
Volume 137, Issue 3, Pages 833-843 (March 2016)  
DOI: 10.1016/j.jaci.2015.11.012

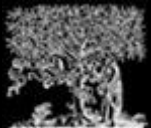

Fig 1

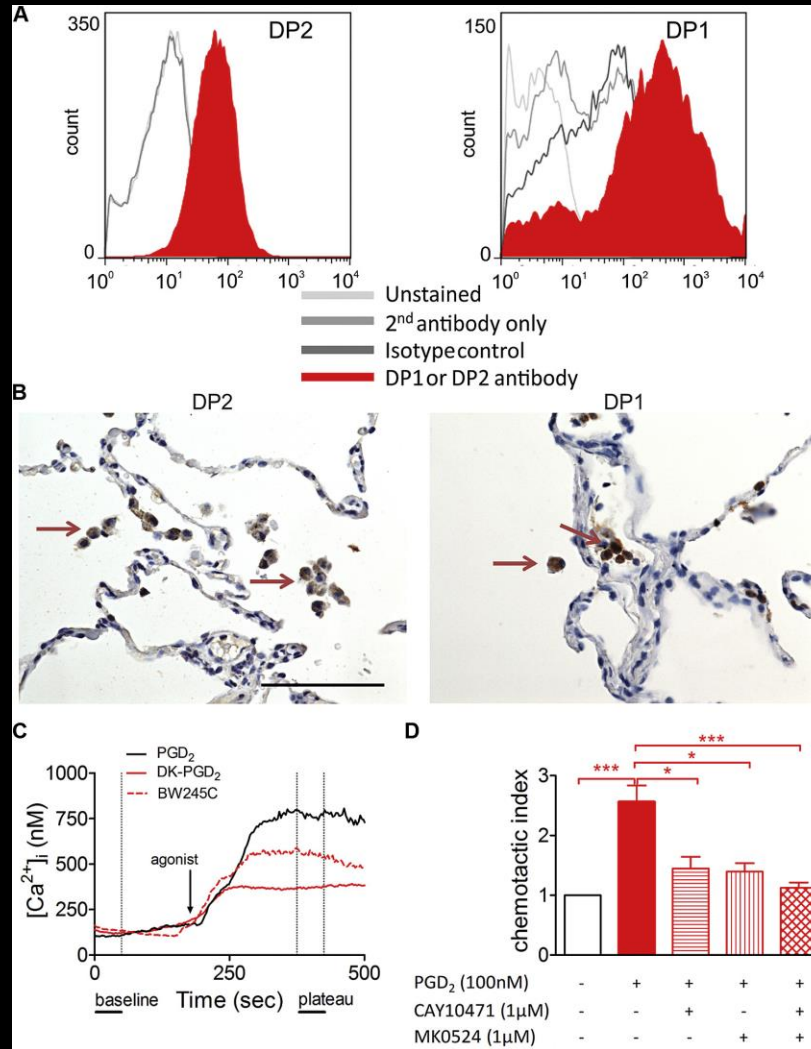

Fig 2

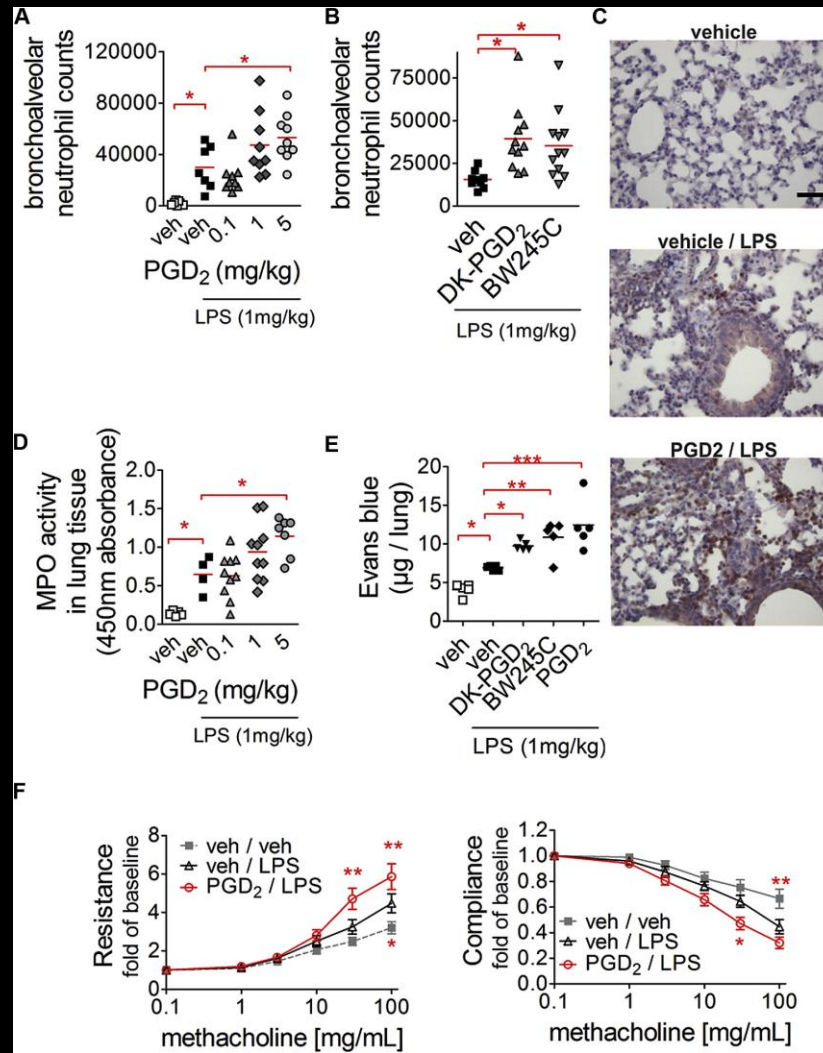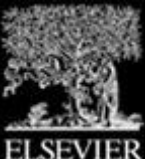

Fig 3

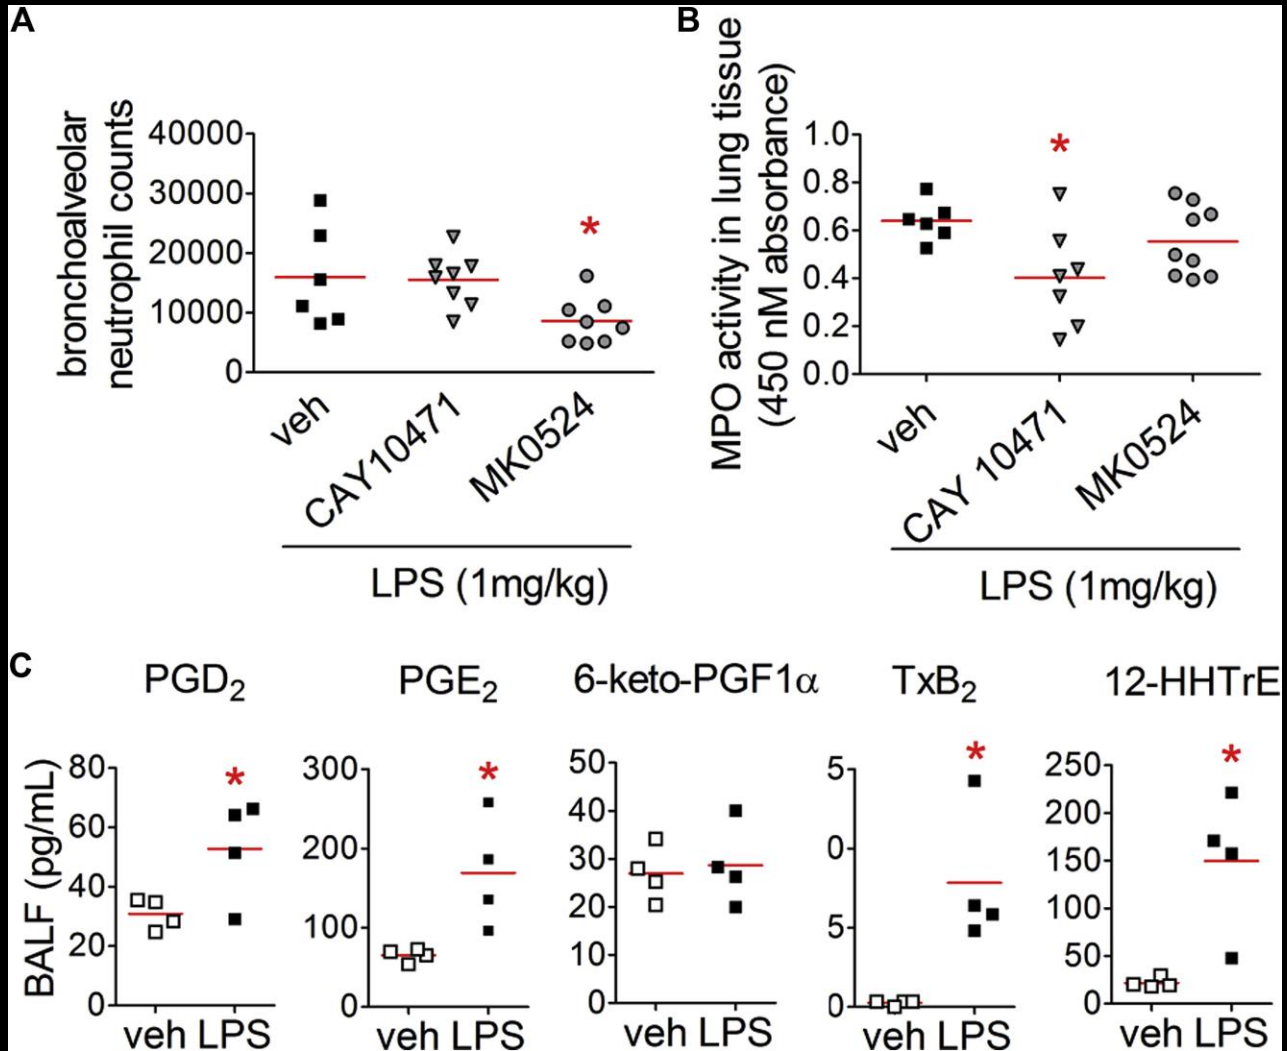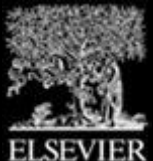

Fig 4

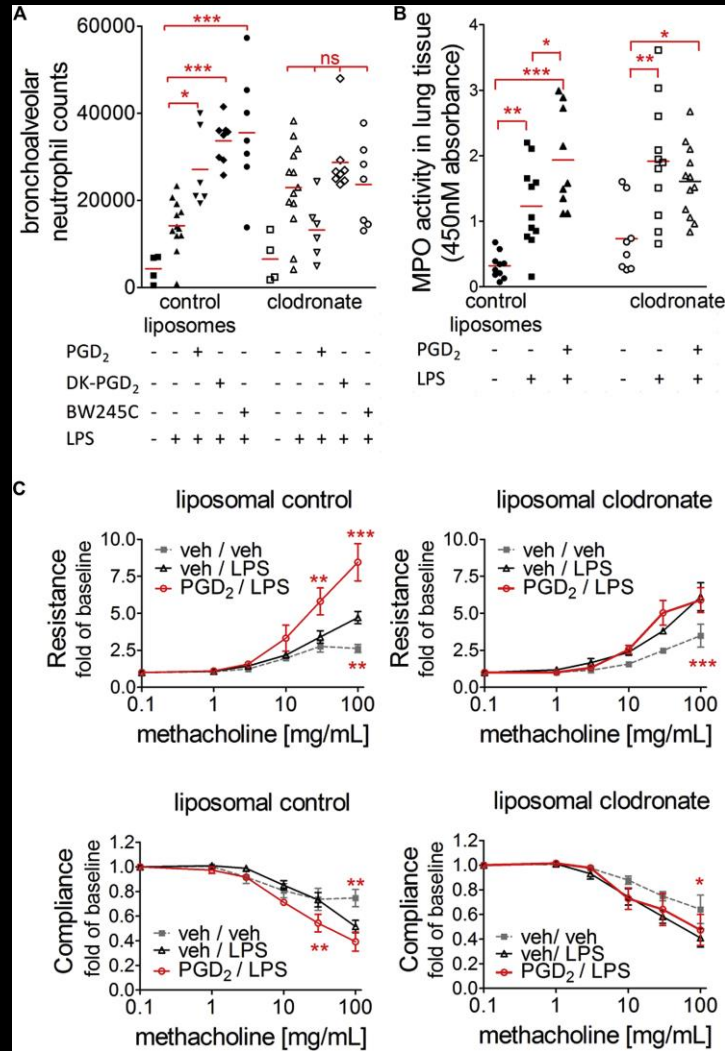

Fig 5

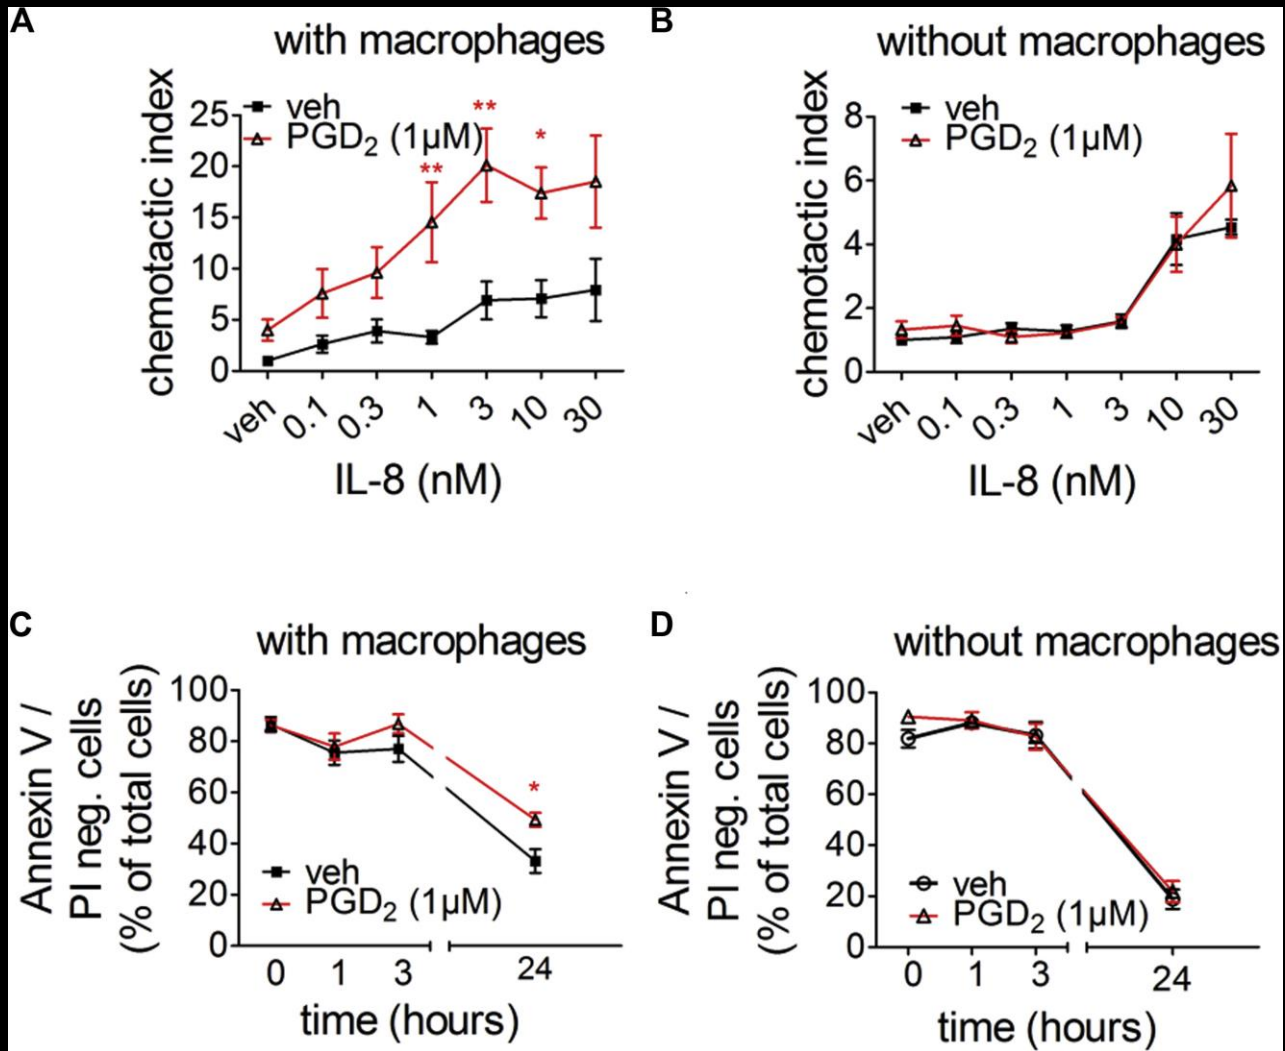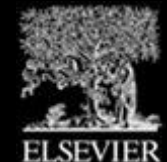

Fig 6

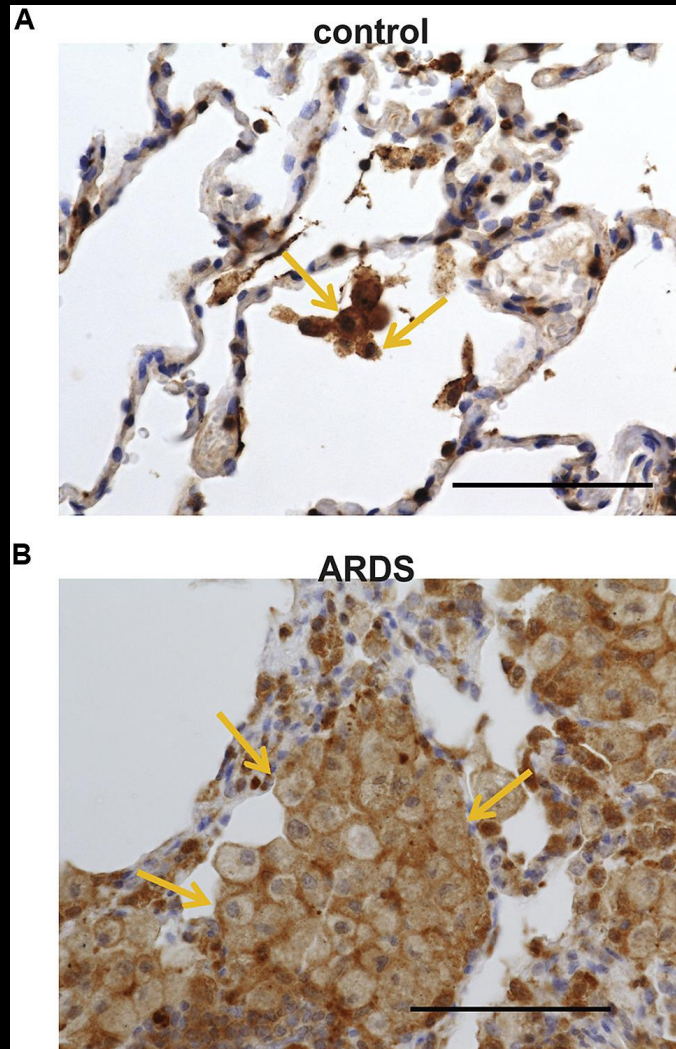

Fig E1

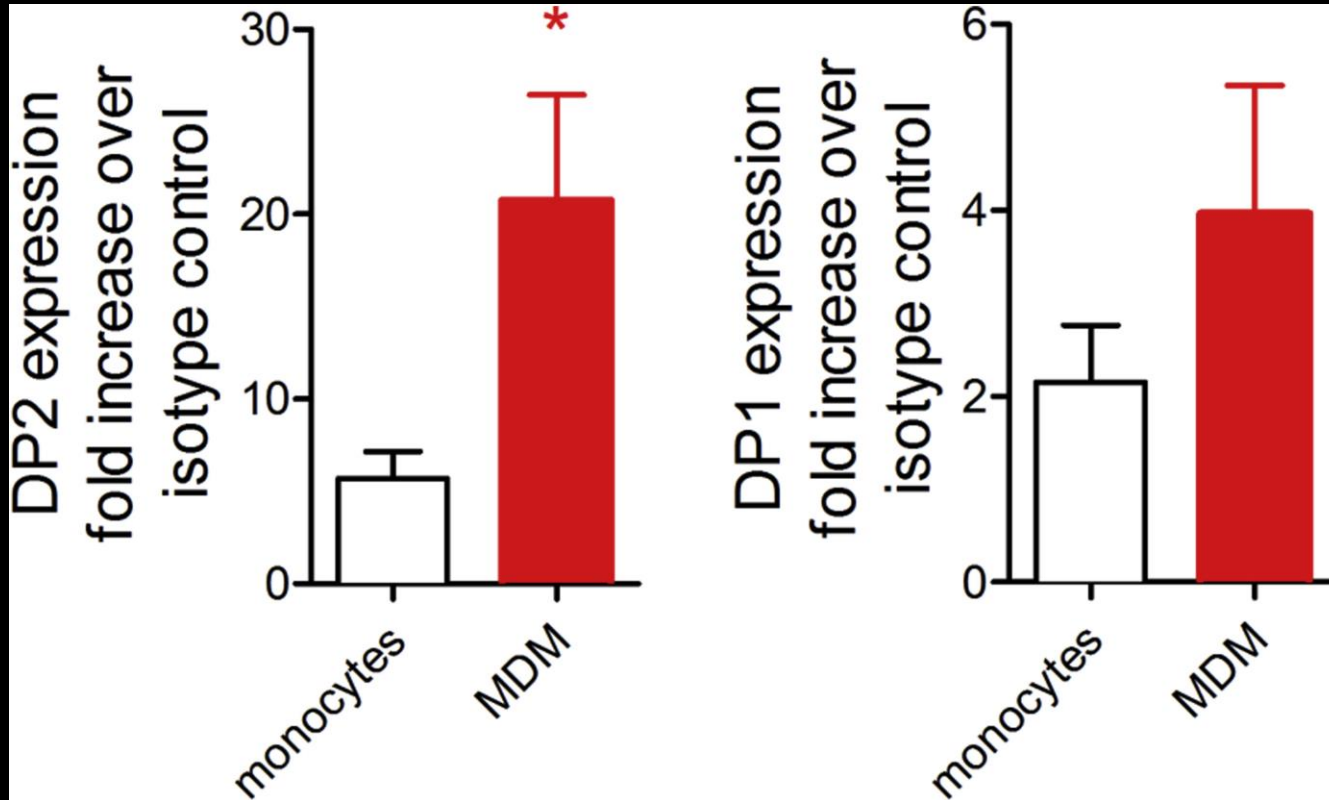



Fig E2

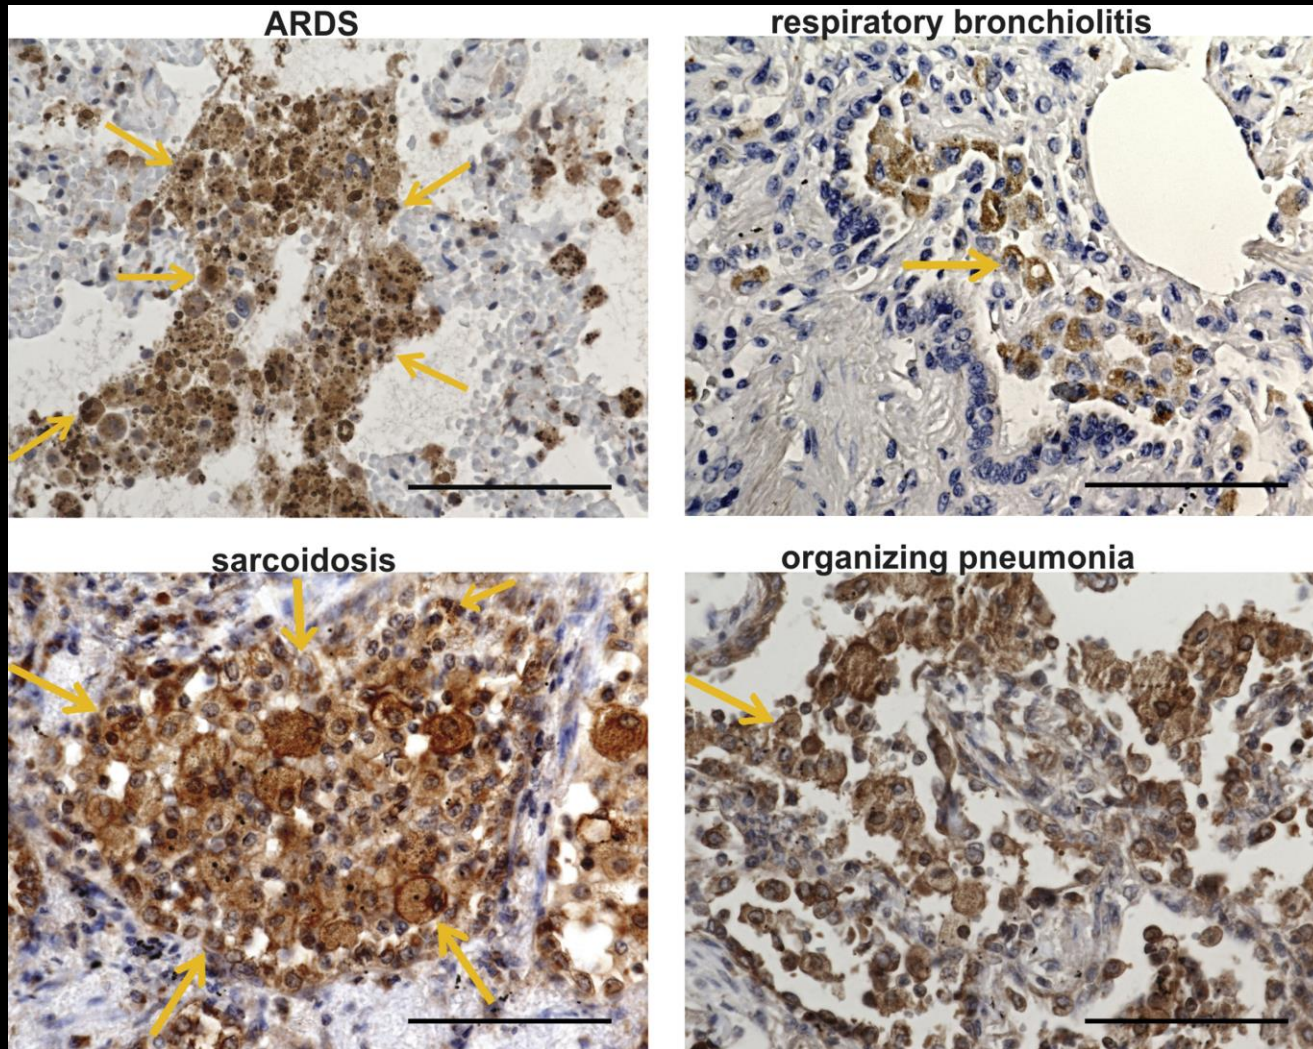

Fig E3

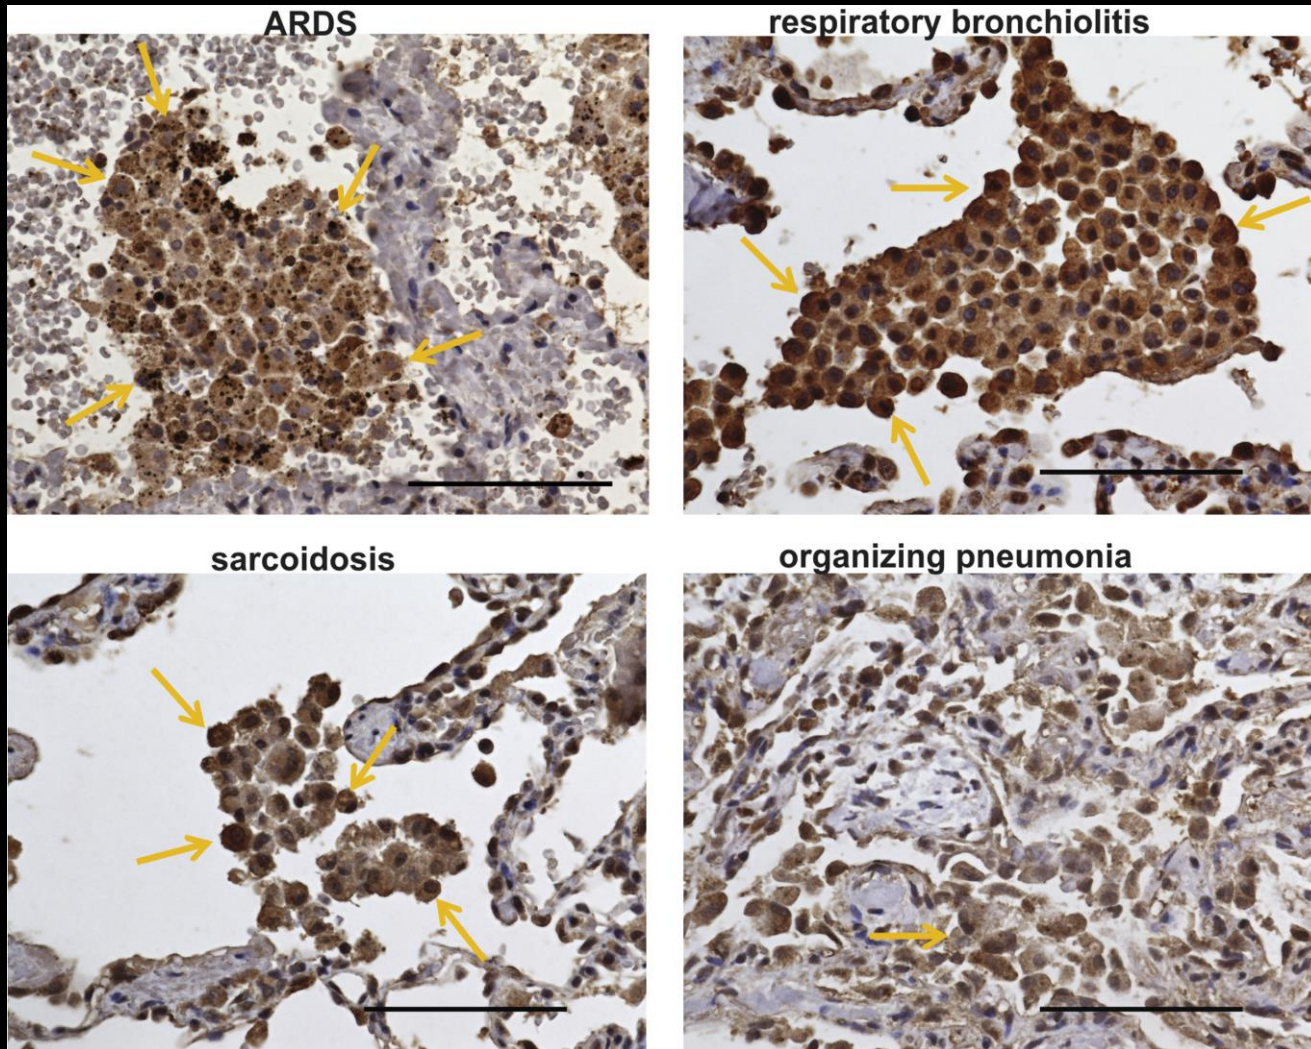

Fig E4

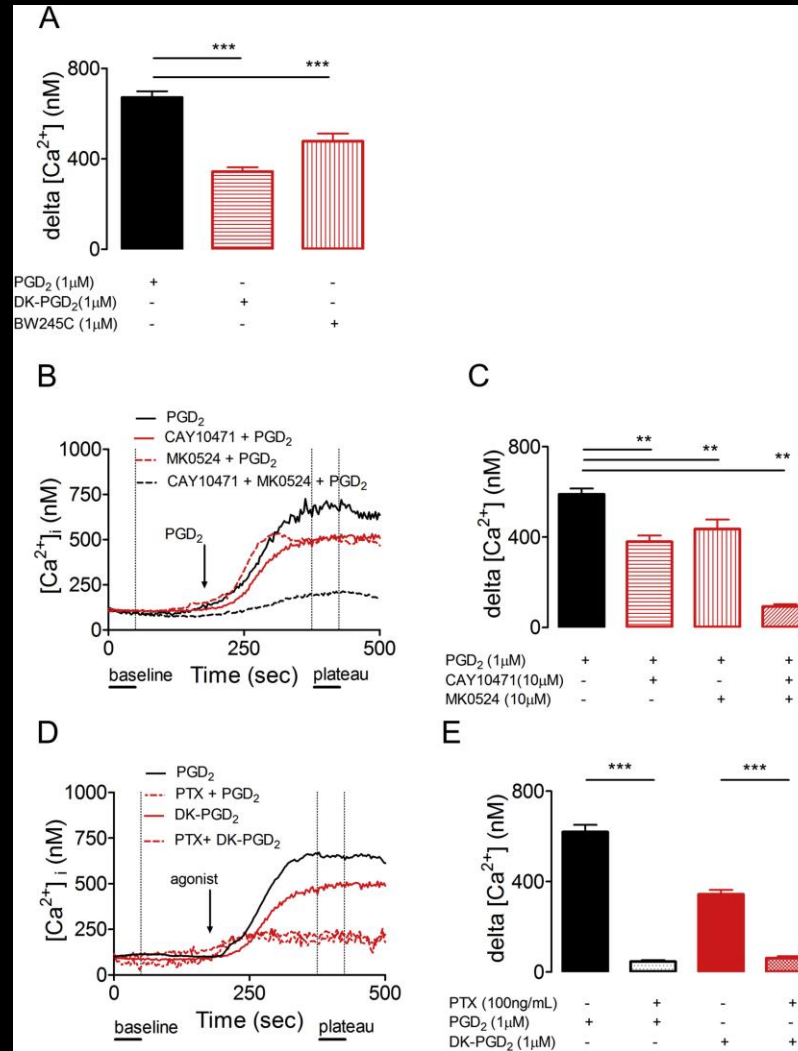

Fig E5

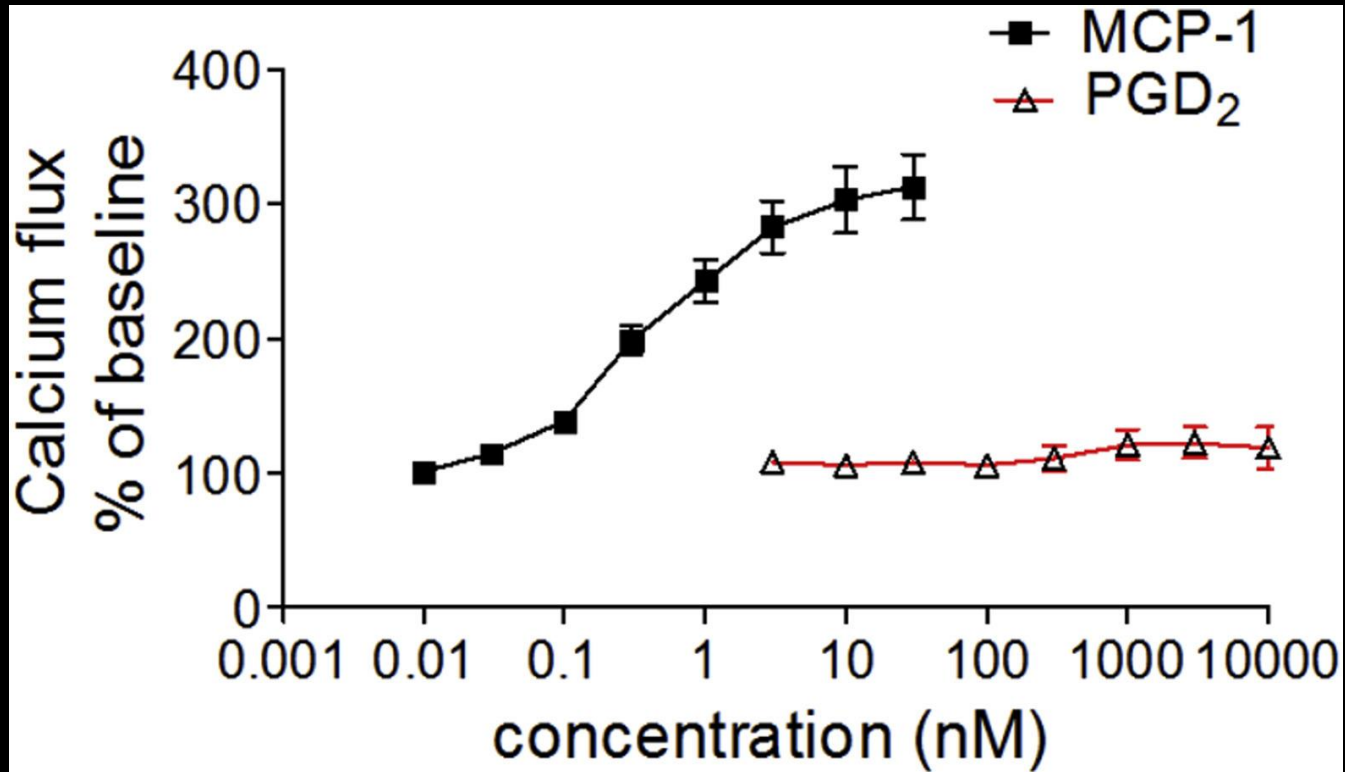

Fig E6

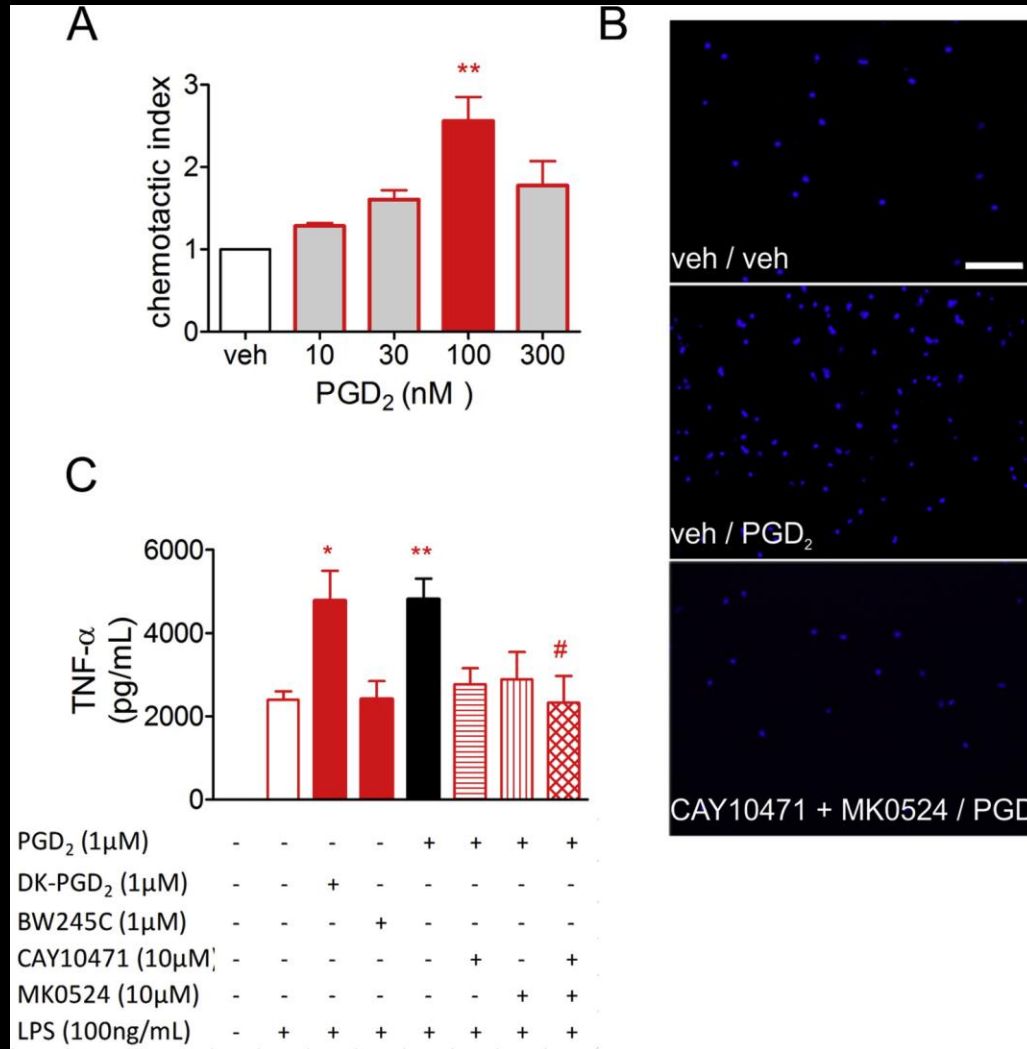

Fig E7

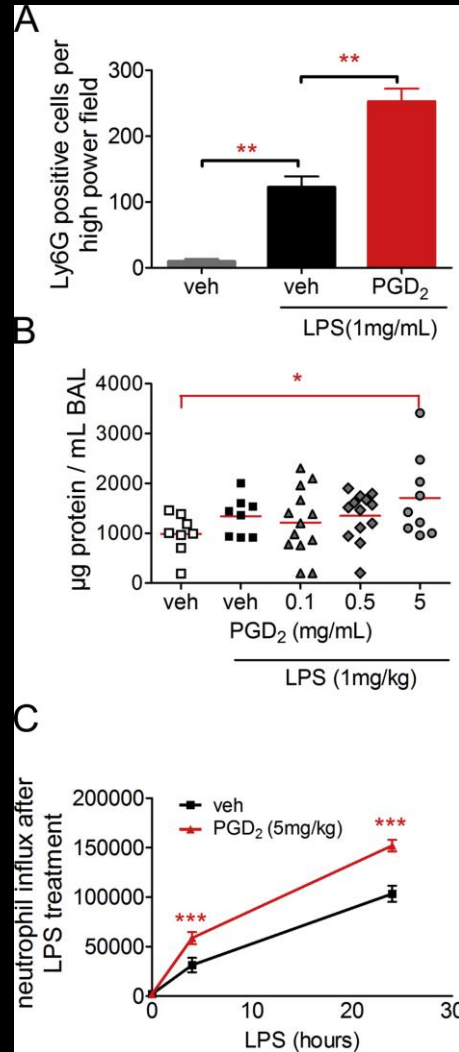

Fig E8

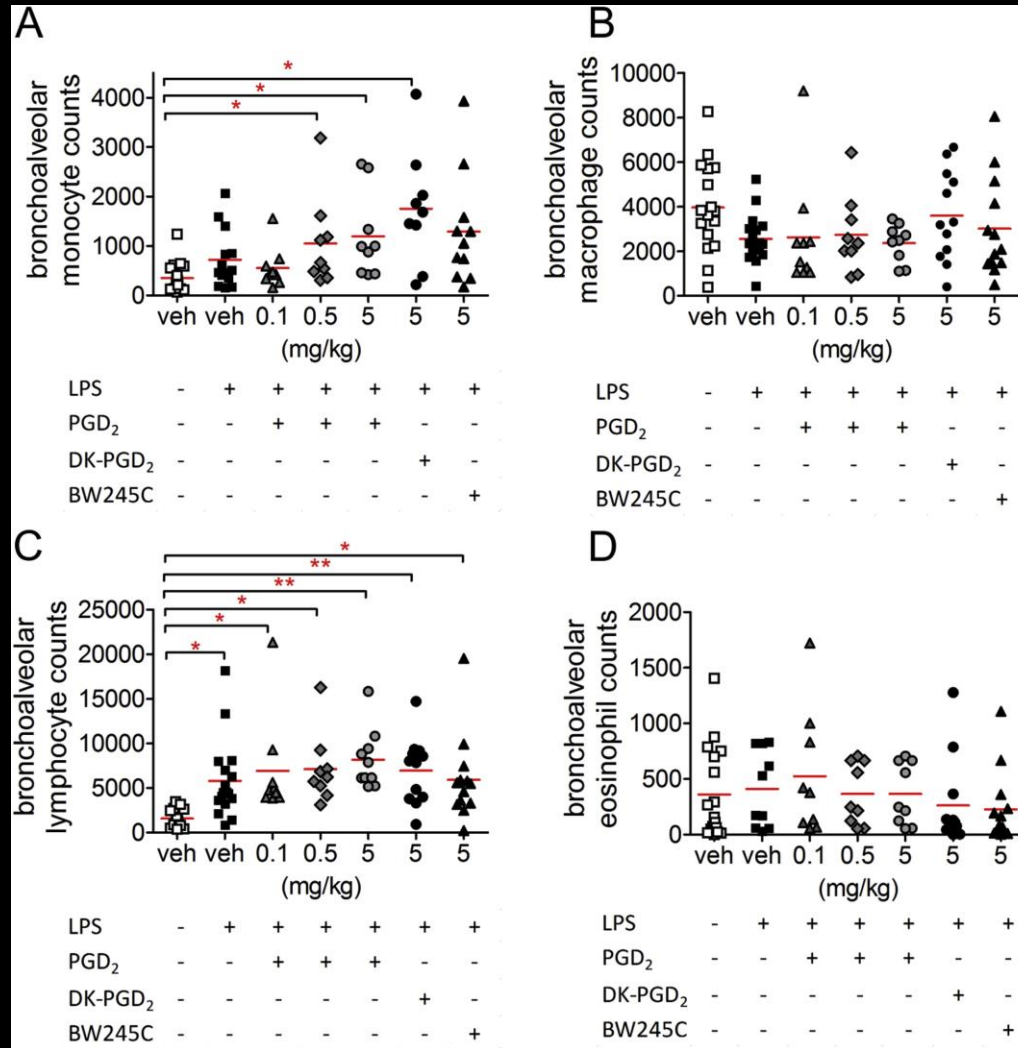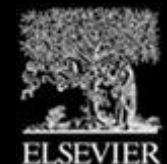

Fig E9

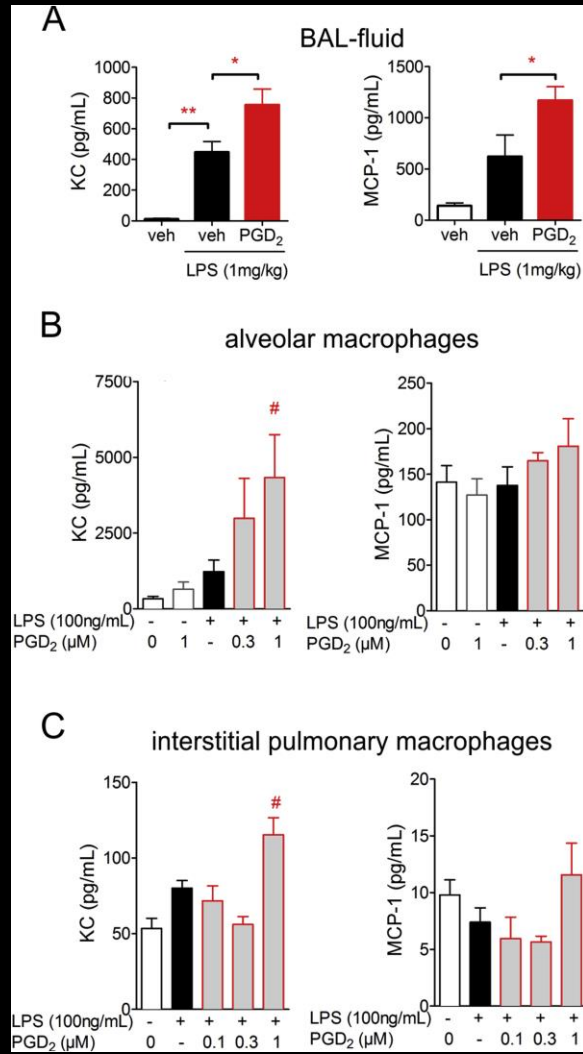



Fig E10

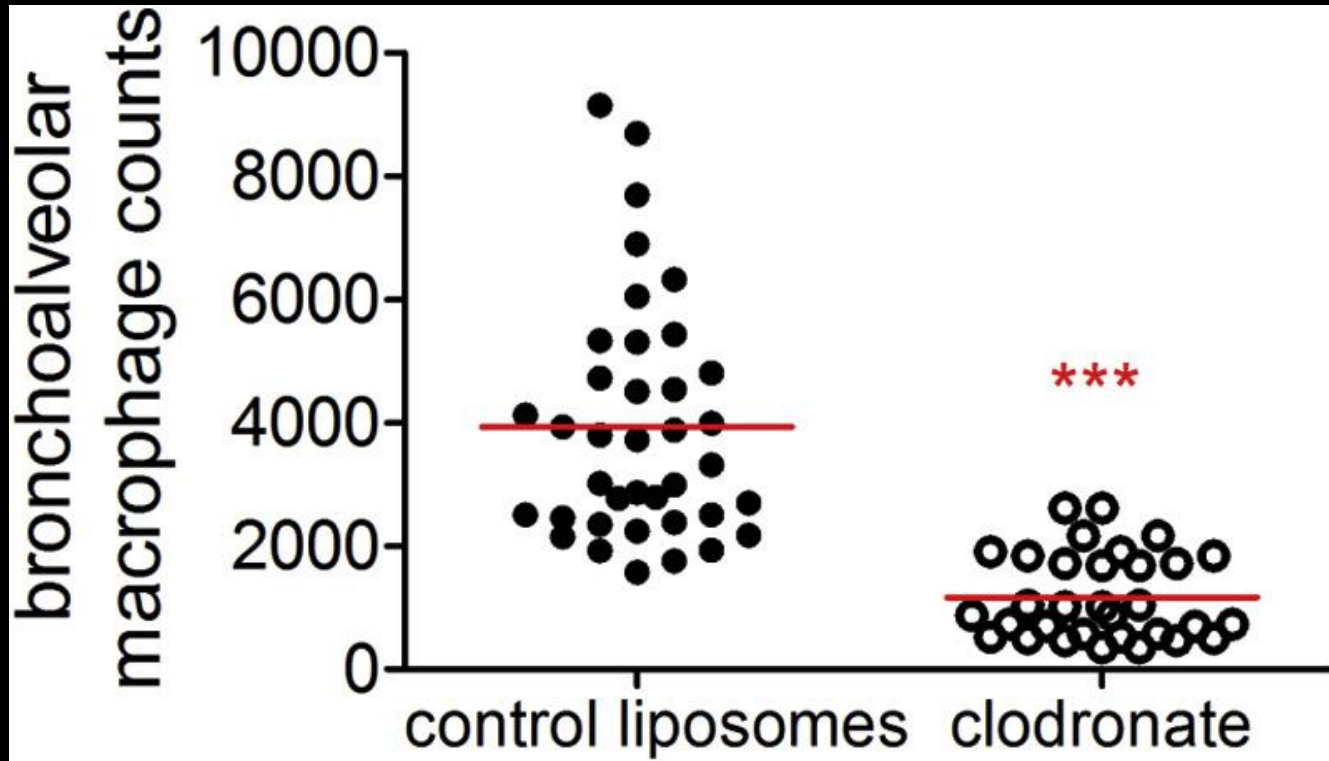

Fig E11

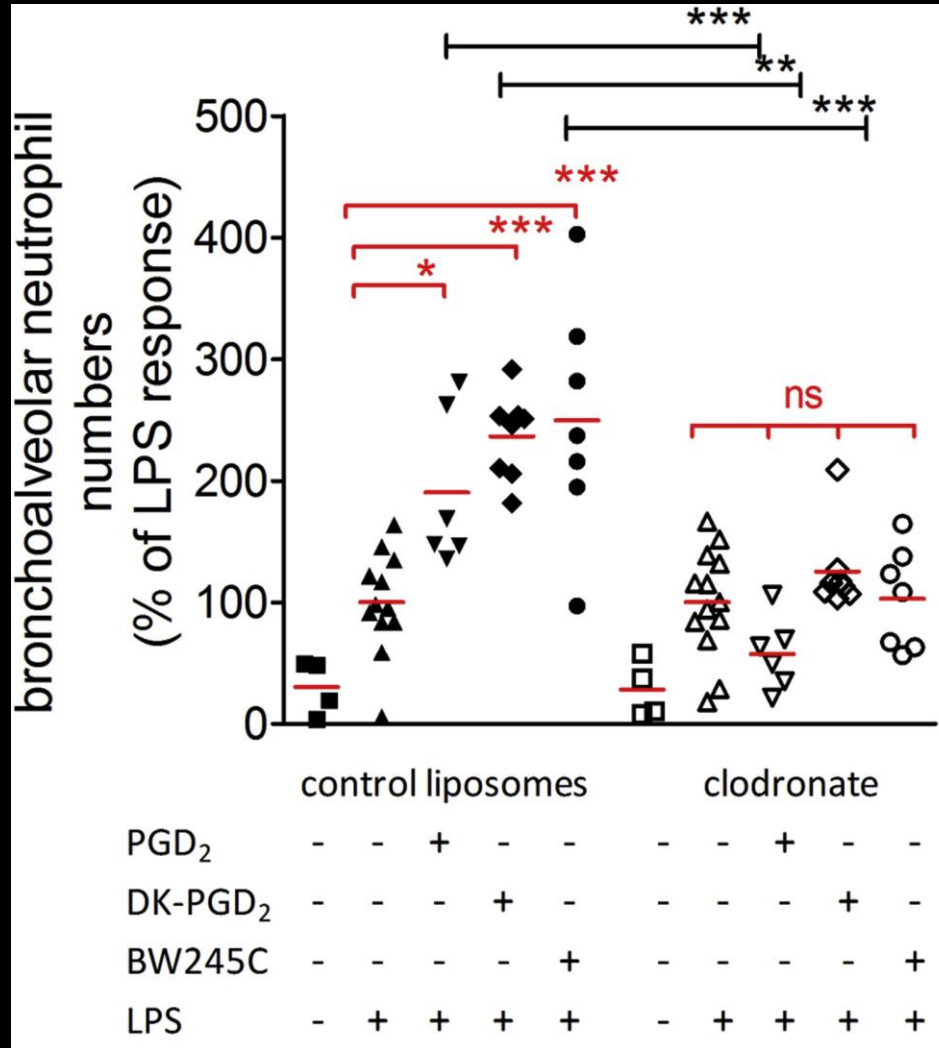

Fig E12

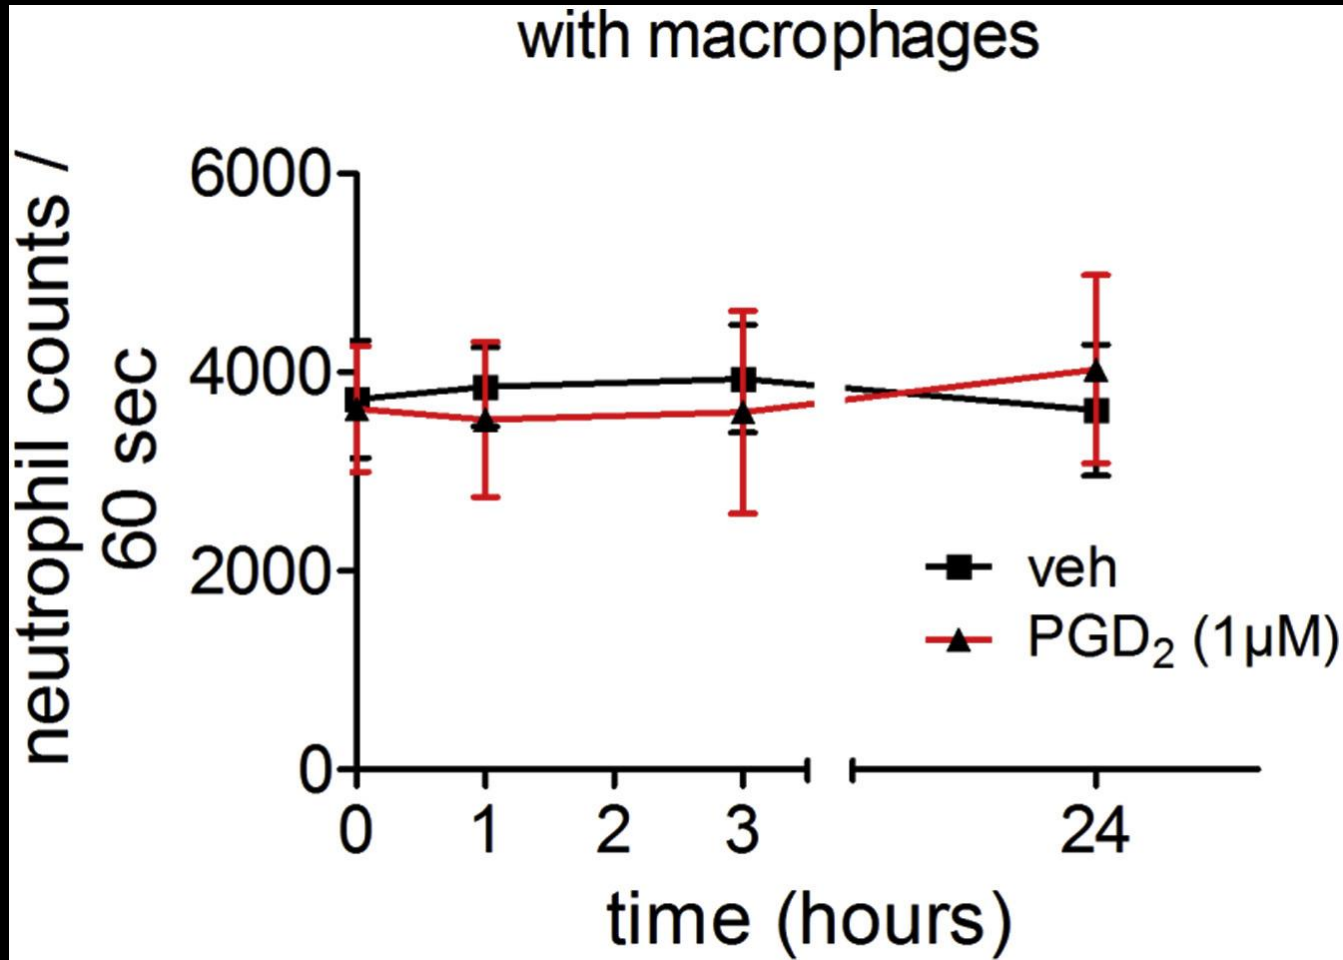

Supplement: NIHMS69115-supplement-Figures__1-E12.pdf [file NIHMS69115-supplement-Figures__1-E12.pdf]
